# Supplementary material
Source: publisher figshare collection journal article supplement (https://frontiersin.figshare.com/ndownloader/files/25650653)
Supplement: Supplementary file [file 25650653]

Physical activity

mnpukb08phys\_activity

{ IASAlternateStandardGroup: .. Standard - vertical, alternative layout }

date

Date of interview

dd.mm.yyyy

date\_interview {Date (dd.mm.yyyy), Date format: display}

Query

{ IASAlternateStandardGroup: .. Standard - vertical, alternative layout }

LOWER EXTREMITY FUNCTION

Tested

yes (1 - 101864)

no (2 - 101747)

lower\_extremity {Horizontal Radiobutton}

Query

{ IASAlternateStandardGroup: .. Standard - vertical, alternative layout }

Can you run short distances?

Can you run short distances?

Yes easily (1 - 102267)

Yes, but a little hard (2 - 102268)

Yes, but very hard (3 - 102269)

No (4 - 102270)

distance\_short {Horizontal Radiobutton}

pain in affected body part

pain\_affect\_short {Checkbox}

pain at other body part

pain\_other\_short {Checkbox}

general health

health\_short {Checkbox}

social reasons

social\_short {Checkbox}

dislike

dislike\_short {Checkbox}

other

other\_short {Checkbox}

specify

other\_spec\_short {Textfield 60}

Query

{ IASAlternateStandardGroup: .. Standard - vertical, alternative layout }

Can you run long distances?

Can you run long distances?

Query

1 of 13

04/03/2019, 11:06

☐ Yes easily (1 - 102267)

☐ Yes, but a little hard (2 - 102268)

☐ Yes, but very hard (3 - 102269)

☐ No (4 - 102270)

distance\_long {Horizontal Radiobutton}

participant too young to assess this activity

☐

too\_young\_long {Checkbox}

pain in affected body part

☐

pain\_affect\_long {Checkbox}

pain at other body part

☐

pain\_other\_long {Checkbox}

general health

☐

health\_long {Checkbox}

social reasons

☐

social\_long {Checkbox}

dislike

☐

dislike\_long {Checkbox}

other

☐

other\_long {Checkbox}

specify

other\_spec\_long {Textfield 60}

{ IASAlternateStandardGroup: .. Standard - vertical, alternative layout }

Can you walk more than 100m?

Can you walk more than 100m?

Query

☐ Yes easily (1 - 102267)

☐ Yes, but a little hard (2 - 102268)

☐ Yes, but very hard (3 - 102269)

☐ No (4 - 102270)

distance\_100m {Horizontal Radiobutton}

pain in affected body part

☐

pain\_affect\_100m {Checkbox}

pain at other body part

☐

pain\_other\_100m {Checkbox}

general health

☐

health\_100m {Checkbox}

social reasons

☐

social\_100m {Checkbox}

dislike

☐

dislike\_100m {Checkbox}

other

☐

other\_100m {Checkbox}

specify

other\_spec\_100m {Textfield 60}

{ IASAlternateStandardGroup: .. Standard - vertical, alternative layout }

Can you walk more than 1000m?

Can you walk more than 1000m?

Query

☐ Yes easily (1 - 102267)

☐ Yes, but a little hard (2 - 102268)

☐ Yes, but very hard (3 - 102269)

☐ No (4 - 102270)

distance\_1000m {Horizontal Radiobutton}

pain in affected body part

☐

pain\_affect\_1000m {Checkbox}

pain at other body part

☐

pain\_other\_1000m {Checkbox}

general health

☐

health\_1000m {Checkbox}

social reasons

☐

social\_1000m {Checkbox}

dislike

☐

dislike\_1000m {Checkbox}

other

☐

other\_1000m {Checkbox}

specify

other\_spec\_1000m {Textfield 60}

**What is the longest distance you can walk**

**longest\_dist\_walk** {Textarea 6,80} "What is the longest distance you can walk"

[illegible]

{ IASAlternateStandardGroup: .. Standard - vertical, alternative layout }

Can you walk uphill?

Can you walk uphill?

Yes easily (1 - 102267)

Yes, but a little hard (2 - 102268)

Yes, but very hard (3 - 102269)

No (4 - 102270)

uphill\_walk {Horizontal Radiobutton}

pain in affected body part

☐

pain\_affect Uphill {Checkbox}

pain at other body part

☐

pain\_other Uphill {Checkbox}

general health

☐

health Uphill {Checkbox}

social reasons

☐

social Uphill {Checkbox}

dislike

☐

dislike Uphill {Checkbox}

other

☐

other Uphill {Checkbox}

specify

other\_spec Uphill {Textfield 60}

{ IASAlternateStandardGroup: .. Standard - vertical, alternative layout }

Can you walk downhill?

Can you walk downhill?

Query

☐

Yes easily (1 - 102267)

☐

Yes, but a little hard (2 - 102268)

☐

Yes, but very hard (3 - 102269)

☐

No (4 - 102270)

downhill\_walk {Horizontal Radiobutton}

pain in affected body part

☐

pain\_affect downhill {Checkbox}

pain at other body part

☐

pain\_other downhill {Checkbox}

general health

☐

health downhill {Checkbox}

social reasons

☐

social downhill {Checkbox}

dislike

☐

dislike downhill {Checkbox}

other

☐

other\_downhill {Checkbox}

specify

other\_spec\_downhill {Textfield 60}

{ IASAlternateStandardGroup: .. Standard - vertical, alternative layout }

Can you participate in ball sports (basketball, soccer, tennis, hockey)?

Can you participate in ball sports (basketball, soccer, tennis, hockey)?

Query

☐ Yes easily (1 - 102267)

☐ Yes, but a little hard (2 - 102268)

☐ Yes, but very hard (3 - 102269)

☐ No (4 - 102270)

sports {Horizontal Radiobutton}

pain in affected body part

☐

pain\_affect\_sports {Checkbox}

pain at other body part

☐

pain\_other\_sports {Checkbox}

general health

☐

health\_sports {Checkbox}

social reasons

☐

social\_sports {Checkbox}

dislike

☐

dislike\_sports {Checkbox}

other

☐

other\_sports {Checkbox}

specify

other\_spec\_sports {Textfield 60}

{ IASAlternateStandardGroup: .. Standard - vertical, alternative layout }

Can you kneel down?

Can you kneel down?

Query

☐ Yes easily (1 - 102267)

☐ Yes, but a little hard (2 - 102268)

☐ Yes, but very hard (3 - 102269)

☐ No (4 - 102270)

kneel {Horizontal Radiobutton}

pain in affected body part

☐

pain\_affect\_kneel {Checkbox}

pain at other body part

☐

pain\_other\_kneel {Checkbox}

general health

☐

health\_kneel {Checkbox}

social reasons

☐

social\_kneel {Checkbox}

dislike

☐

dislike\_kneel {Checkbox}

other

☐

other\_kneel {Checkbox}

specify

other\_spec\_kneel {Textfield 60}

{ IASAlternateStandardGroup: .. Standard - vertical, alternative layout }

Can you sit on a sofa or in a car for an hour?

Can you sit on a sofa or in a car for an hour?

Query

☐ Yes easily (1 - 102267)

☐ Yes, but a little hard (2 - 102268)

☐ Yes, but very hard (3 - 102269)

☐ No (4 - 102270)

sit {Horizontal Radiobutton}

pain in affected body part

☐

pain\_affect\_sit {Checkbox}

pain at other body part

☐

pain\_other\_sit {Checkbox}

general health

☐

health\_sit {Checkbox}

social reasons

☐

social\_sit {Checkbox}

dislike

☐

dislike\_sit {Checkbox}

other

☐

other\_sit {Checkbox}

specify

other\_spec\_sit {Textfield 60}

{ IASAlternateStandardGroup: .. Standard - vertical, alternative layout }

Notes on physical activities of lower limb

Notes on physical activities of lower limb

comments\_lower\_limb {Textarea 6,80}

Query

{ IASAlternateStandardGroup: .. Standard - vertical, alternative layout }

UPPER EXTREMITY FUNCTION

UPPER EXTREMITY FUNCTION

Tested

☐ yes (1 - 101864)

☐ no (2 - 101747)

upper\_extremity {Horizontal Radiobutton}

Query

{ IASAlternateStandardGroup: .. Standard - vertical, alternative layout }

Can you use the affected limb to do light work e.g. getting dressed, showering?

Can you use the affected limb to do light work e.g. getting dressed, showering?

☐ Yes easily (1 - 102267)

☐ Yes, but a little hard (2 - 102268)

☐ Yes, but very hard (3 - 102269)

☐ No (4 - 102270)

lightwork {Horizontal Radiobutton}

pain in affected body part

☐

pain\_affect\_lightwor {Checkbox}

pain at other body part

☐

pain\_other\_lightwork {Checkbox}

general health

☐

health\_lightwork {Checkbox}

social reasons

☐

social\_lightwork {Checkbox}

dislike

☐

dislike\_lightwork {Checkbox}

other

Query

☐

other\_lightwork {Checkbox}

specify

other\_spec\_lightwork {Textfield 60}

{ IASAlternateStandardGroup: .. Standard - vertical, alternative layout }

Can you use the affected limb to do heavy work e.g. lifting a suitcase?

Can you use the affected limb to do heavy work e.g. lifting a suitcase?

☐

Yes easily (1 - 102267)

☐

Yes, but a little hard (2 - 102268)

☐

Yes, but very hard (3 - 102269)

☐

No (4 - 102270)

heavywork {Horizontal Radiobutton}

participant too young to assess this activity

☐

too\_young\_heavywork {Checkbox}

pain in affected body part

☐

pain\_affect\_heavywor {Checkbox}

pain at other body part

☐

pain\_other\_heavywork {Checkbox}

general health

☐

health\_heavywork {Checkbox}

social reasons

☐

social\_heavywork {Checkbox}

dislike

☐

dislike\_heavywork {Checkbox}

other

☐

other\_heavywork {Checkbox}

specify

other\_spec\_heavywork {Textfield 60}

{ IASAlternateStandardGroup: .. Standard - vertical, alternative layout }

Can you use the affected limb for tools e.g. screwdriver?

Can you use the affected limb for tools e.g. screwdriver?

☐

Yes easily (1 - 102267)

☐

Yes, but a little hard (2 - 102268)

☐

Yes, but very hard (3 - 102269)

☐

No (4 - 102270)

tools {Horizontal Radiobutton}

pain in affected body part

☐

pain\_affect\_tools {Checkbox}

pain at other body part

☐

pain\_other\_tools {Checkbox}

general health

☐

health\_tools {Checkbox}

social reasons

☐

social\_tools {Checkbox}

dislike

☐

dislike\_tools {Checkbox}

other

☐

other\_tools {Checkbox}

specify

other\_spec\_tools {Textfield 60}

{ IASAlternateStandardGroup: .. Standard - vertical, alternative layout }

Can you use the affected limb to put weight on e.g. plan position?

Can you use the affected limb to put weight on e.g. plan position?

Query

☐

Yes easily (1 - 102267)

☐

Yes, but a little hard (2 - 102268)

☐

Yes, but very hard (3 - 102269)

☐

No (4 - 102270)

weight {Horizontal Radiobutton}

pain in affected body part

☐

pain\_affect\_weight {Checkbox}

pain at other body part

☐

pain\_other\_weight {Checkbox}

general health

☐

health\_weight {Checkbox}

social reasons

☐

social\_weight {Checkbox}

dislike

☐

dislike\_weight {Checkbox}

other

☐

other\_weight {Checkbox}

specify

other\_spec\_weight {Textfield 60}

{ IASAlternateStandardGroup: .. Standard - vertical, alternative layout }

Can you use the affected limb to work overhead e.g. grabbing something from a high shelf?

Can you use the affected limb to work overhead e.g. grabbing something from a high shelf?

Query

☐ Yes easily (1 - 102267)

☐ Yes, but a little hard (2 - 102268)

☐ Yes, but very hard (3 - 102269)

☐ No (4 - 102270)

overhead {Horizontal Radiobutton}

pain in affected body part

☐

pain\_affect\_overhead {Checkbox}

pain at other body part

☐

pain\_other\_overhead {Checkbox}

general health

☐

health\_overhead {Checkbox}

social reasons

☐

social\_overhead {Checkbox}

dislike

☐

dislike\_overhead {Checkbox}

other

☐

other\_overhead {Checkbox}

specify

other\_spec\_overhead {Textfield 60}

{ IASAlternateStandardGroup: .. Standard - vertical, alternative layout }

Notes on physical activities of upper limb

Query

Notes on physical activities of upper limb

comments\_upper\_limb {Textarea 6,80}

{ IASHeadline: ..... Headline }

Current state of health

{ IASAlternateStandardGroup: .. Standard - vertical, alternative layout }

current state of health

Query

Now, after all these questions: How do you describe your health regarding the previously infected body part?  
If 5 is good and 1 is bad

< Please choose > ▼

health\_score {Popup (Label Group)}

If necessary, please specify

comments\_health {Textarea 6,80}

{ IASAlternateStandardGroup: .. Standard - vertical, alternative layout }

doc current state of health

Query

Doctor's perspective: How would you describe the health of the participant regarding the previously infected body part?  
If 5 is good and 1 is bad

< Please choose > ▼

health\_score\_doc {Popup (Label Group)}

If necessary, please specify

comments\_health\_doc {Textarea 6,80}

{ IASAlternateStandardGroup: .. Standard - vertical, alternative layout }

Comments

Comments

optional

comments {Textarea 10,100}

12 of 13

04/03/2019, 11:06
